# Supplementary material for: Treatment of Critical Size Femoral Bone Defects with Biomimetic Hybrid Scaffolds of 3D Plotted Calcium Phosphate Cement and Mineralized Collagen Matrix
Source: MDPI journal article supplement (doi:10.3390/ijms23063400), 2022-03-21
Supplement: s1 [file s1]

supplementary materials

# Treatment of critical size femoral bone defects with biomimetic hybrid scaffolds of 3D plotted calcium phosphate cement and mineralized collagen matrix

Anna Carla Culla<sup>1,2,3</sup>, Corina Vater<sup>1,2</sup>, Xinggui Tian<sup>1,2\*</sup>, Julia Bolte<sup>1,2</sup>, Tilman Ahlfeld<sup>2</sup>, Henriette Bretschneider<sup>1,2</sup>, Alexander Pape<sup>1,2</sup>, Stuart B. Goodman<sup>4</sup>, Michael Gelinsky<sup>2</sup> and Stefan Zwingenberger<sup>1,2</sup>

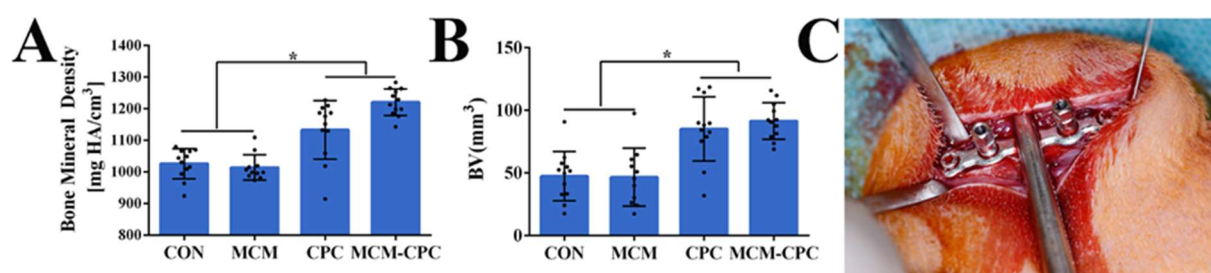

**Figure S1.** Evaluation of bone defect healing 8 weeks after surgery. **(A):** bone mineral density (BMD) and **(B):** bone volume (BV) as measured by  $\mu$ CT. **(C):** Rat femoral defect model showing defect area and fixation device (mean  $\pm$  SD, \* $p < 0.05$ ).
